# Supplementary material
Source: HighWire-hosted journal article supplement (https://bmjopen.bmj.com/content/12/9/e062304)
Supplement: inline-supplementary-material-1 [file inline-supplementary-material-1.pdf]

### Appendix: ICD-9/ICD-10-AM/SOCRATES diagnostic codes and medication codes used to identify dementia cases

| ICD-9 Code*     | Description                                                                 |
|-----------------|-----------------------------------------------------------------------------|
| 2900            | Senile dementia uncomplicated                                               |
| 2901            | Presenile dementia                                                          |
| 29010           | Presenile dementia uncomplicated                                            |
| 29011           | Presenile dementia with delirium                                            |
| 29012           | Presenile dementia with delusional features                                 |
| 29013           | Presenile dementia with depressive features                                 |
| 2902            | Senile dementia with delusional or depressive features                      |
| 29020           | Senile dementia with delusional features                                    |
| 29021           | Senile dementia with depressive features                                    |
| 2903            | Senile dementia with delirium                                               |
| 2904            | Arteriosclerotic dementia                                                   |
| 29040           | Arteriosclerotic dementia uncomplicated                                     |
| 29041           | Arteriosclerotic dementia with delirium                                     |
| 29042           | Arteriosclerotic dementia with delusional features                          |
| 29043           | Arteriosclerotic dementia depressive features                               |
| 2912            | Other alcoholic dementia                                                    |
| 29282           | Drug-induced dementia                                                       |
| 2941            | Dementia in conditions classified elsewhere                                 |
| 29410           | Dementia in conditions classified elsewhere without behavioural disturbance |
| 29411           | Dementia in conditions classified elsewhere with behavioural disturbance    |
| 3310            | Alzheimer's disease                                                         |
| 2948            | Other specified organic brain syndromes (chronic)                           |
| 3311            | Pick's disease                                                              |
| ICD-10-AM Code* | Description                                                                 |
| F00             | Dementia in Alzheimer's disease                                             |
| F000            | Dementia in Alzheimer's disease with early onset (G30.0+)                   |
| F001            | Dementia in Alzheimer's disease with late onset (G30.1+)                    |
| F002            | Dementia in Alzheimer's disease atypical or mixed type (G30.8+)             |
| F009            | Dementia in Alzheimer's disease unspecified (G30.9+)                        |
| F01             | Vascular dementia                                                           |
| F010            | Vascular dementia of acute onset                                            |
| F011            | Multi-infarct dementia of acute onset                                       |
| F012            | Subcortical vascular dementia                                               |
| F013            | Mixed cortical and subcortical vascular dementia                            |
| F018            | Other vascular dementia                                                     |
| F019            | Vascular dementia unspecified                                               |
| F02             | Dementia in other diseases classified elsewhere                             |
| F020            | Dementia in Pick's diseases (G31.0+)                                        |
| F021            | Dementia in Creutzfeldt-Jakob disease (A81.0+)                              |

|                                  |                                                                        |
|----------------------------------|------------------------------------------------------------------------|
| F022                             | Dementia in Huntington's diseases (G10+)                               |
| F023                             | Dementia in Parkinson's diseases (G20+)                                |
| F024                             | Dementia in human immunodeficiency virus [HIV] disease (B22.0+)        |
| F028                             | Dementia in other specified diseases classified elsewhere              |
| F03                              | Unspecified dementia                                                   |
| F051                             | Delirium superimposed on dementia                                      |
| G30                              | Alzheimer's disease                                                    |
| G300                             | Alzheimer's disease with early onset                                   |
| G301                             | Alzheimer's disease with late onset                                    |
| G308                             | Other Alzheimer's disease                                              |
| G309                             | Alzheimer's disease unspecified                                        |
| G31                              | Other degenerative diseases of nervous system not elsewhere classified |
| G310                             | Circumscribed brain atrophy                                            |
| G311                             | Senile degeneration of brain not elsewhere classified                  |
| G318                             | Other specified degenerative diseases of nervous system                |
| G319                             | Degenerative diseases of nervous system unspecified                    |
| <b>SOCRATES diagnostic codes</b> | <b>Referral Diagnosis/health Condition</b>                             |
| 140                              | Dementia                                                               |
| 1401                             | Alzheimer's (including early onset)                                    |
| 1403                             | Korsakov's syndrome / alcohol-related dementia                         |
| 1404                             | Pick's                                                                 |
| 1405                             | Vascular dementia                                                      |
| 1499                             | Other dementia (specify)                                               |

\* ICD-9 and ICD-10-AM codes: Mortality, Privately funded hospital discharges, Programme for the Integration of Mental Health Data (PRIMHD) and publicly funded hospital discharges

| DIM_FOR<br>M<br>_PACK_<br>SUBSIDY_<br>KEY | TG_NAME2                | CHEM<br>ICAL_<br>ID | CHEMICAL<br>_NAME          | FOR<br>MU<br>LATI<br>ON<br>ID | BRAND<br>_NAME    | BAS<br>E_<br>UNI<br>TS | PHAR<br>M<br>ACO<br>DE |
|-------------------------------------------|-------------------------|---------------------|----------------------------|-------------------------------|-------------------|------------------------|------------------------|
| 77756                                     | Treatments for Dementia | 3923                | Donepezil<br>hydrochloride | 392325                        | NULL              | tab                    | NULL                   |
| 77757                                     | Treatments for Dementia | 3923                | Donepezil<br>hydrochloride | 392326                        | NULL              | tab                    | NULL                   |
| 77775                                     | Treatments for Dementia | 3923                | Donepezil<br>hydrochloride | 392326                        | Donepezil-<br>Rex | tab                    | 23491<br>40            |
| 77776                                     | Treatments for Dementia | 3923                | Donepezil<br>hydrochloride | 392325                        | Donepezil-<br>Rex | tab                    | 23491<br>59            |
| 81399                                     | Treatments for Dementia | 3923                | Donepezil<br>hydrochloride | 392326                        | Donepezil-<br>Rex | tab                    | 23491<br>40            |
| 814XX                                     | Treatments for Dementia | 3923                | Donepezil<br>hydrochloride | 392325                        | Donepezil-<br>Rex | tab                    | 23491<br>59            |

|       |                                         |      |                         |        |                  |       |         |
|-------|-----------------------------------------|------|-------------------------|--------|------------------|-------|---------|
| 83473 | Treatments for Dementia                 | 3923 | Donepezil hydrochloride | 392326 | Donepezil-Rex    | tab   | 2349140 |
| 83474 | Treatments for Dementia                 | 3923 | Donepezil hydrochloride | 392325 | Donepezil-Rex    | tab   | 2349159 |
| 57263 | Stimulants/ADHD Treatments for Dementia | 3750 | Rivastigmine            | 375026 | NULL             | cap   | NULL    |
| 57264 | Stimulants/ADHD Treatments for Dementia | 3750 | Rivastigmine            | 375025 | NULL             | cap   | NULL    |
| 81297 | Treatments for Dementia                 | 4037 | Rivastigmine            | 403725 | NULL             | patch | NULL    |
| 81298 | Treatments for Dementia                 | 4037 | Rivastigmine            | 403726 | NULL             | patch | NULL    |
| 81325 | Treatments for Dementia                 | 4037 | Rivastigmine            | 403726 | Exelon           | patch | 2273608 |
| 81326 | Treatments for Dementia                 | 4037 | Rivastigmine            | 403725 | Exelon           | patch | 2273616 |
| 85739 | Treatments for Dementia                 | 4037 | Rivastigmine            | 403725 | Generic Partners | patch | 2581493 |
| 85740 | Treatments for Dementia                 | 4037 | Rivastigmine            | 403726 | Generic Partners | patch | 2581507 |
| 85927 | Treatments for Dementia                 | 4037 | Rivastigmine            | 403726 | Exelon           | patch | 2273608 |
| 85928 | Treatments for Dementia                 | 4037 | Rivastigmine            | 403725 | Exelon           | patch | 2273616 |
